# Supplementary material for: The Effectiveness of the Blended Learning in Conservative Dentistry with Endodontics on the Basis of the Survey among 4th-Year Students during the COVID-19 Pandemic
Source: MDPI journal article supplement (doi:10.3390/ijerph18094555), 2021-04-25
Supplement: s1 [file s1]

**The effectiveness of the blended learning in conservative dentistry with endodontics on the basis of the survey among 4th-year students during the COVID-19 pandemic**  
*(translated version of the questionnaire)*

*\*Required*

**1. Gender \***

*Choose only one answer*

Female/Male

**2. Age**

**3. Did you participate in the contact-wise clinical classes in conservative dentistry with endodontics in the third year? \***

*Choose only one answer*

Yes/No

**4. Did you have to quarantine or isolate yourself during the pandemic due to coronavirus infection (your own or someone close to you)? \***

*Choose only one answer*

Yes/No

**5. Do you plan to take the suggested vaccinations? \***

*Choose only one answer*

Yes/No

---

**Self-evaluation**

**6. On a scale from 1 to 5 (1 the lowest, 5 the highest), how would you rate: \***

*Select only one answer in a row*

|                                                                      | 1 | 2 | 3 | 4 | 5 |
|----------------------------------------------------------------------|---|---|---|---|---|
| Your theoretical knowledge after the 3rd year?                       |   |   |   |   |   |
| Your practical skills after the 3rd year?                            |   |   |   |   |   |
| Your interpersonal skills after the 3rd year?                        |   |   |   |   |   |
| Your theoretical knowledge after the first semester of the 4th year? |   |   |   |   |   |
| Your practical skills after the first semester of the 4th year?      |   |   |   |   |   |
| Your interpersonal skills after the first semester of the 4th year?  |   |   |   |   |   |

**7. Has the effectiveness of your learning changed during the pandemic? \***

*Choose only one answer*

Yes Go to the 8th question

No Go to the 10th question

---

**Self-evaluation (continued)**

**8. How has your learning effectiveness changed during the pandemic? \***

*Choose only one answer*

Increased/decreased

**9. Why? \***

---

**Self-evaluation (continued)**

**10. Did you learn with friends during the pre-pandemic period? \***

*Choose only one answer*

Yes Go to the 11th question

No Go to the 13th question

**11. Do you still learn with friends? \***

*Choose only one answer*

Yes/No

**12. What has changed in this regard?**

---

**Evaluation of theoretical e-learning classes in the 4th year in conservative dentistry with endodontics**

**13. On a scale from 1 to 5 (1 the lowest, 5 the highest), how would you rate: \***

*Select only one answer in a row*

|                                    | 1 | 2 | 3 | 4 | 5 |
|------------------------------------|---|---|---|---|---|
| quality of recorded presentations? |   |   |   |   |   |
| preparation for self-tests?        |   |   |   |   |   |
| commitment to learning?            |   |   |   |   |   |
| time spent on learning?            |   |   |   |   |   |
| commitment of the teachers?        |   |   |   |   |   |
| spectrum of discussed issues?      |   |   |   |   |   |

**14. How do you rate compared to traditional classroom-based seminars: \***

*Select only one answer in a row*

|                                    | Better | Comparatively | Worse |
|------------------------------------|--------|---------------|-------|
| quality of recorded presentations? |        |               |       |
| preparation for self-tests?        |        |               |       |
| commitment to learning?            |        |               |       |
| time spent on learning?            |        |               |       |
| commitment of the teachers?        |        |               |       |
| spectrum of discussed issues?      |        |               |       |

**15. Which of the remote classes do you find more beneficial? \***

*Choose only one answer*

the e-learning platform sOLAT/online meetings via MS Teams

**16. Why? \***

**17. Did you feel any deficiencies in the content of the seminars? \***

*Choose only one answer*

Yes/No

**18. If so, what kind?**

---

## Evaluation of practical clinical classes in the 4th year in conservative dentistry with endodontics

19. On a scale from 1 to 5 (1 the lowest, 5 the highest), how would you rate: \*

Select only one answer in a row

|                                        | 1 | 2 | 3 | 4 | 5 |
|----------------------------------------|---|---|---|---|---|
| quality of conducted clinicals?        |   |   |   |   |   |
| preparation for clinicals?             |   |   |   |   |   |
| commitment to clinical work?           |   |   |   |   |   |
| time spent on preparing for clinicals? |   |   |   |   |   |
| commitment of the teachers?            |   |   |   |   |   |
| spectrum of performed procedures?      |   |   |   |   |   |

20. How do you rate compared to before the pandemic: \*

Select only one answer in a row

|                                        | Better | Comparatively | Worse |
|----------------------------------------|--------|---------------|-------|
| quality of conducted clinicals?        |        |               |       |
| preparation for clinicals?             |        |               |       |
| commitment to clinical work?           |        |               |       |
| time spent on preparing for clinicals? |        |               |       |
| commitment of the teachers?            |        |               |       |
| spectrum of performed procedures?      |        |               |       |

21. Did you feel any deficiencies in terms of diagnosing and treating patients (taking into account the current sanitary regime resulting in the limit of admitted patients)? \*

Choose only one answer

Yes/No

22. If so, what kind?

---

## Evaluation of safety during COVID-19 pandemic

23. Did you have any concerns about participating in clinical classes? \*

Choose only one answer

Yes/No

24. If so, what kind?

25. On a scale from 1 to 5 (1 the lowest, 5 the highest), how would you rate the level of safety during clinical activities: \*

|                               | 1 | 2 | 3 | 4 | 5 |
|-------------------------------|---|---|---|---|---|
| yours and the other students? |   |   |   |   |   |
| admitted patients?            |   |   |   |   |   |

26. In your opinion, the provided personal protective equipment is: \*

Choose only one answer

Insufficient/Sufficient/Excessive

27. If insufficient or excessive, why?

28. In your opinion, should patients be tested (rapid antigen tests) before participating in clinical activities? \*

*Choose only one answer*

Yes/No

29. In your opinion, should students and academic teachers be tested (rapid antigen tests) before participating in clinical activities? \*

*Choose only one answer*

Yes/No

30. If so, how often?

31. In your opinion, should vaccination be mandatory for students and academic teachers before participating in clinical activities? \*

*Choose only one answer*

Yes/No

32. Why?

---

#### Evaluation of performed blended learning in conservative dentistry with endodontics

33. On a scale from 1 to 5 (1 the lowest, 5 the highest), how would you rate the current blended-learning model? \*

*Choose only one answer*

| 1 | 2 | 3 | 4 | 5 |
|---|---|---|---|---|
|   |   |   |   |   |

34. How would you rate the current blended-learning model compared to other dental subjects? \*

*Choose only one answer*

Better/Comparatively/Worse

35. Briefly justify your assessment: \*

36. In your opinion, is the blended-learning model beneficial and could it continue after the pandemic is over? \*

*Choose only one answer*

Yes/No

37. Why? \*

38. What do you think is the best outcome of the blended-learning model? \*

39. What do you think is the worst outcome of the blended-learning model? \*

---

Thank you for completing the survey.

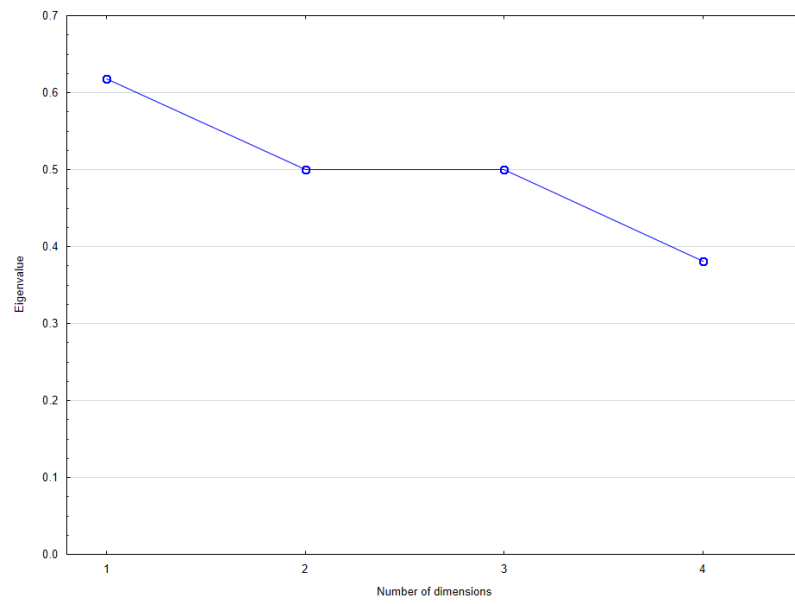

**Figure S1.** Scree plot for multidimensional correspondence analysis – advantages of blended learning.

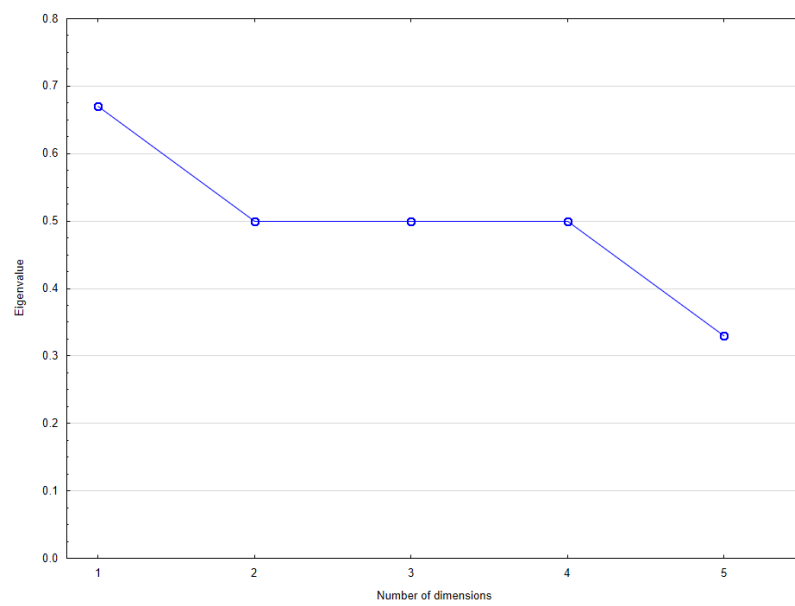

**Figure S2.** Scree plot for multidimensional correspondence analysis – disadvantages of blended learning.

**Table S1.** Parameters of determined points in multidimensional correspondence analysis – advantages of blended learning.

|                                  | x      | y                     | Quality | Relative Inertia | x       |       | y                    |                      |
|----------------------------------|--------|-----------------------|---------|------------------|---------|-------|----------------------|----------------------|
|                                  |        |                       |         |                  | Inertia | cos^2 | Inertia              | cos^2                |
| Blended learning:pro             | 0.215  | 0.000                 | 0.619   | 0.017            | 0.035   | 0.619 | 0.000                | 0.000                |
| Blended learning:con             | -2.879 | -7.30E <sup>-17</sup> | 0.619   | 0.233            | 0.465   | 0.619 | 3.70E <sup>-34</sup> | 3.98E <sup>-34</sup> |
| Individualised pace              | 0.254  | -0.643                | 0.184   | 0.181            | 0.014   | 0.025 | 0.115                | 0.159                |
| Return to recorded presentations | 0.139  | 1.789                 | 0.995   | 0.191            | 0.004   | 0.006 | 0.756                | 0.989                |
| Time saving                      | -1.269 | -0.382                | 0.585   | 0.188            | 0.325   | 0.536 | 0.036                | 0.049                |
| Increased efficiency             | 0.906  | -0.628                | 0.376   | 0.191            | 0.157   | 0.254 | 0.093                | 0.122                |

**Table S2.** Parameters of determined points in multidimensional correspondence analysis – disadvantages of blended learning.

|                                | x      | y                    | Quality | Relative Inertia | x       |       | Y                    |                      |
|--------------------------------|--------|----------------------|---------|------------------|---------|-------|----------------------|----------------------|
|                                |        |                      |         |                  | Inertia | cos^2 | Inertia              | cos^2                |
| Blended learning:pro           | -0.234 | 0.000                | 0.670   | 0.015            | 0.038   | 0.670 | 0.000                | 0.000                |
| Blended learning:con           | 2.865  | 1.03E <sup>-17</sup> | 0.670   | 0.185            | 0.462   | 0.670 | 7.98E <sup>-36</sup> | 8.63E <sup>-36</sup> |
| virtually no drawbacks         | -0.687 | 0.376                | 0.436   | 0.117            | 0.146   | 0.335 | 0.059                | 0.100                |
| Reduced interpersonal contacts | 0.614  | 0.731                | 0.327   | 0.147            | 0.074   | 0.135 | 0.141                | 0.192                |
| Time rigour in examinations    | -0.687 | -2.400               | 0.795   | 0.177            | 0.040   | 0.060 | 0.652                | 0.735                |
| Technical problems             | -0.687 | 1.232                | 0.078   | 0.192            | 0.013   | 0.019 | 0.057                | 0.059                |
| Decreased concentration        | 1.336  | -0.731               | 0.475   | 0.166            | 0.226   | 0.365 | 0.091                | 0.109                |
